# Supplementary material
Source: PubMed Central journal article supplement (PMC5656530)
Supplement: NIHMS905343-supplement-supplement_1.pdf [file NIHMS905343-supplement-supplement_1.pdf]

## Supporting Information for

### **Targeted Nanotherapeutics Encapsulating Liver X Receptor Agonist GW3965 Enhance Anti-atherogenic Effects without Adverse Effects on Hepatic Lipid Metabolism in *Ldlr*<sup>-/-</sup> Mice**

*Mikyung Yu\**, *Jaume Amengual\**, *Arjun Menon*, *Nazila Kamaly*, *Felix Zhou*, *Xiaoding Xu*, *Phei Er Saw*, *Seung-Joo Lee*, *Kevin Si*, *Carleena Angelica Ortega*, *Won Il Choi*, *In-Hyun Lee*, *Yazan Bdour*, *Jinjun Shi*, *Morteza Mahmoudi*, *Sangyong Jon*, *Edward A. Fisher<sup>†</sup>*, *Omid. C. Farokhzad<sup>†</sup>*

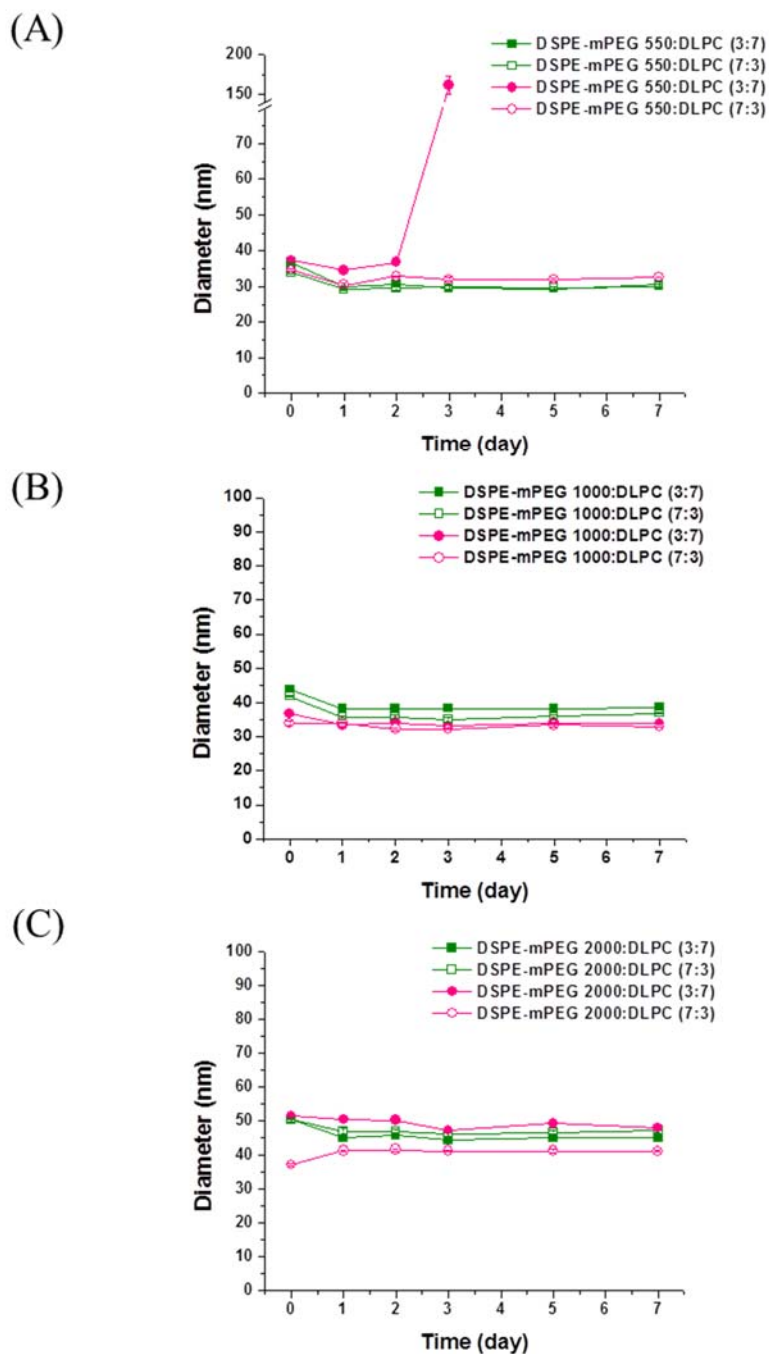

**Figure S1.** *In vitro* stabilities of the (A) NPs(550), (B) NPs(1000), and (C) NPs(2000) over 7 days. NPs(550), NPs(1000), and NPs(2000) were prepared with DSPE-mPEGs: DLPC (3:7 and 7:3), and incubated with PBS (green) and 10% FBS (pink), respectively, under gentle stirring (100 rpm) at 37°C. All the NPs with the molar ratio of DSPE-mPEGs: DLPC (7:3) were stable for 7 days in both PBS and 10% FBS.

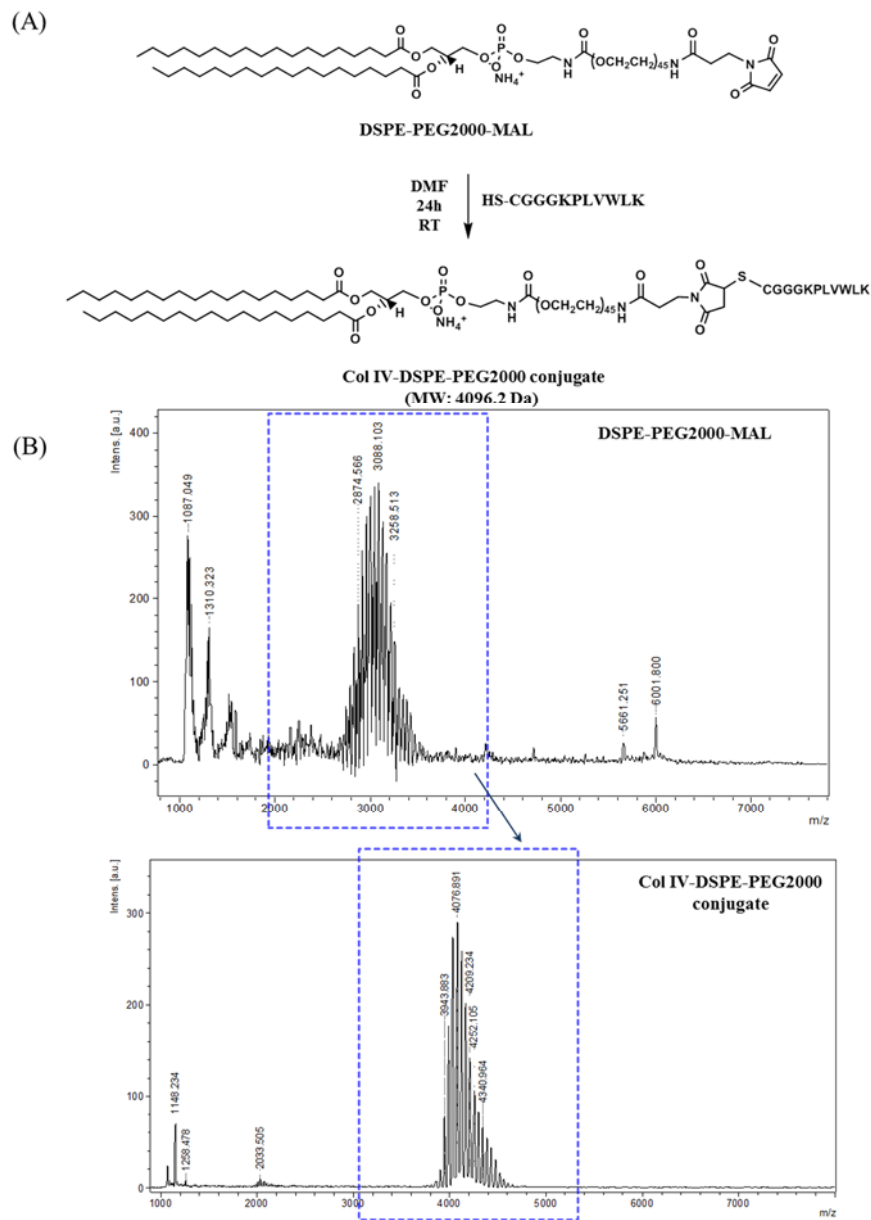

**Figure S2.** Synthesis and characterization of Col IV-DSPE-PEG2000 conjugate. **(A)** Schematic of Col IV-DSPE-PEG2000 synthesis. The maleimide-functionalized DSPE-PEG2000 (DSPE-PEG2000-MAL) dissolved in chloroform was added to the Col IV-targeting peptide (KLWVLPKGGGC) that was previously dissolved in dry DMF. The reaction was stirred at RT for 24h, then the final product of Col IV-DSPE-PEG2000 conjugate was purified using HPLC. **(B)** MALDI TOF Mass Spectrometry measurement of DSPE-PEG2000-MAL and Col IV-DSPE-PEG2000 conjugate.

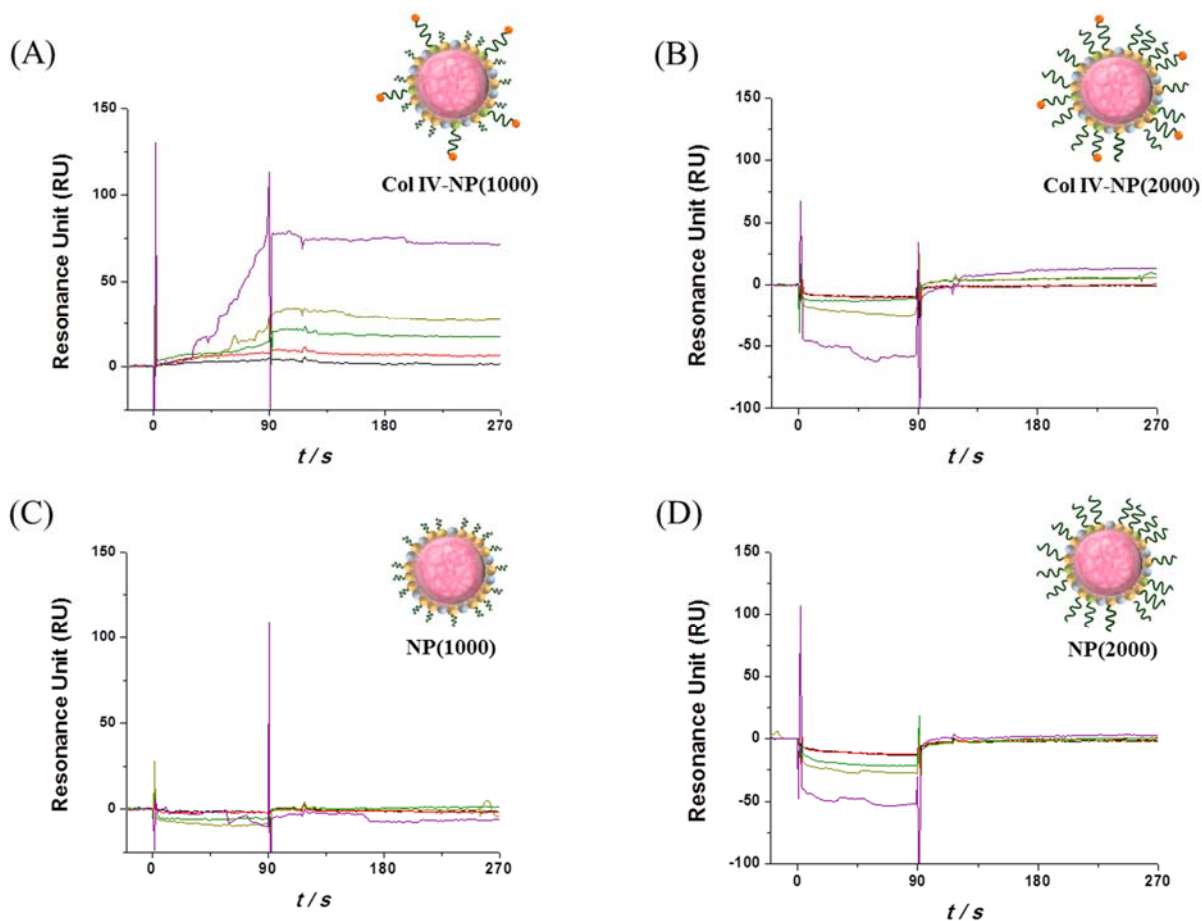

**Figure S3.** SPR sensorgrams obtained from BIAcore chips with immobilized collagen IV upon treatments with various concentrations of **(A)** Col IV-NPs(1000), **(B)** Col IV-NPs(2000), **(C)** NPs(1000), and **(D)** NPs(2000) (serial half dilution of the NPs from purple to black: purple: 5 mg/mL; yellow: 2.5 mg/mL; green: 1.25 mg/mL; red: 0.625 mg/mL; and black: 0.3 mg/mL). The RU value in Col IV-NPs(1000) was higher than those of other NPs.

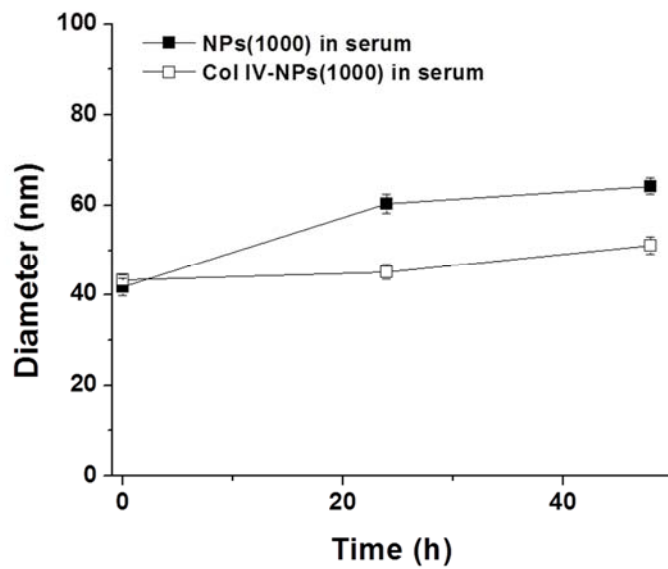

**Figure S4.** *In vitro* stabilities of NP(1000) and Col IV-NP(1000) in serum (100% FBS) at 37°C. Data are expressed as mean  $\pm$  SEM.

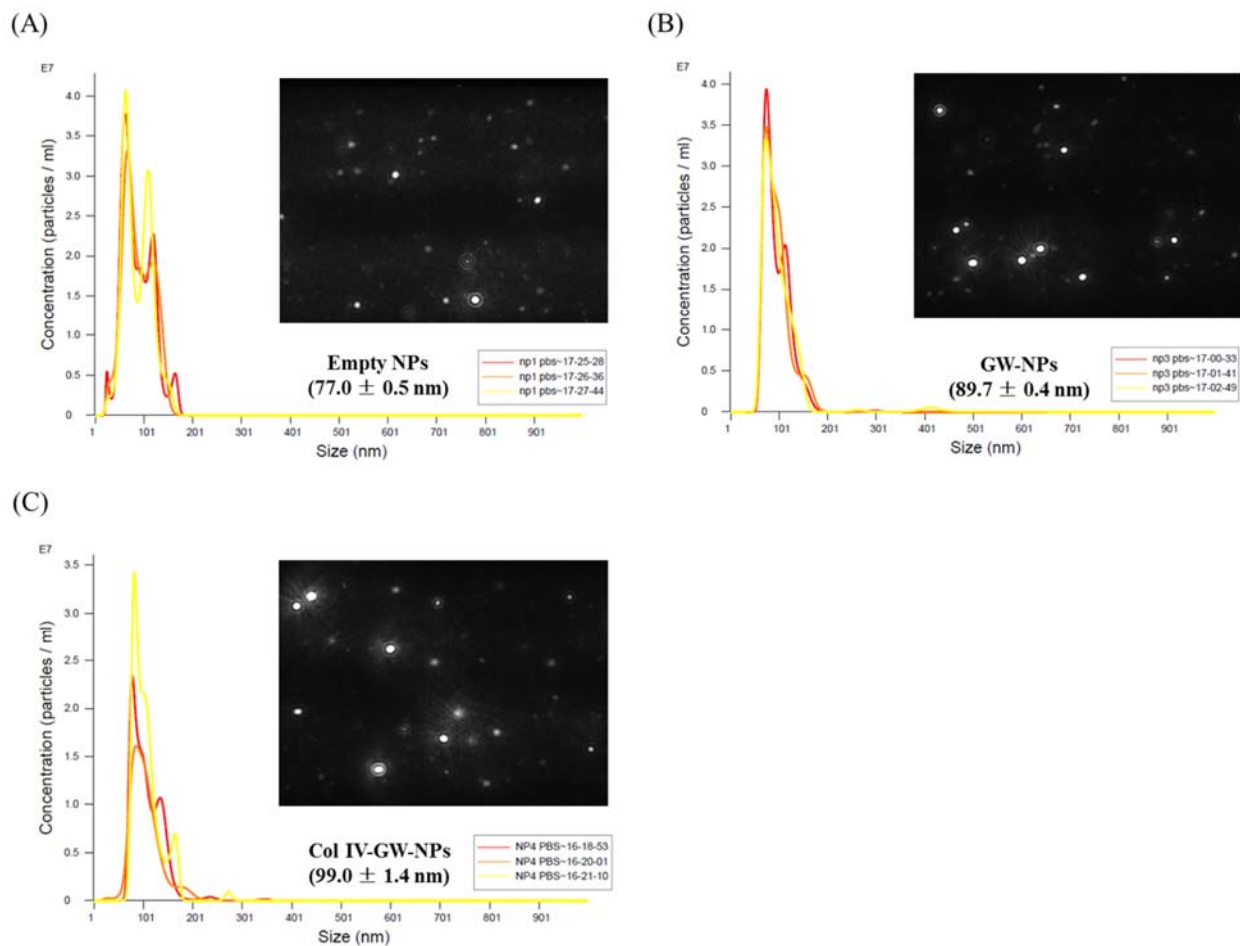

**Figure S5.** The mean hydrodynamic size measurements of empty NPs, GW-NPs, and Col IV-GW-NPs determined by nanoparticle tracking analysis (NTA). Inset data are expressed as the mean  $\pm$  SEM.

(A)

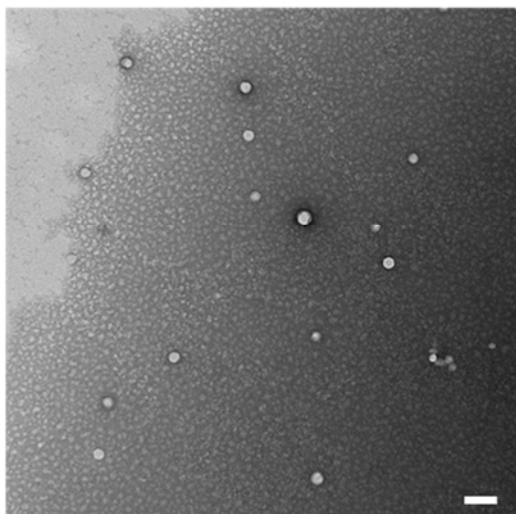

(B)

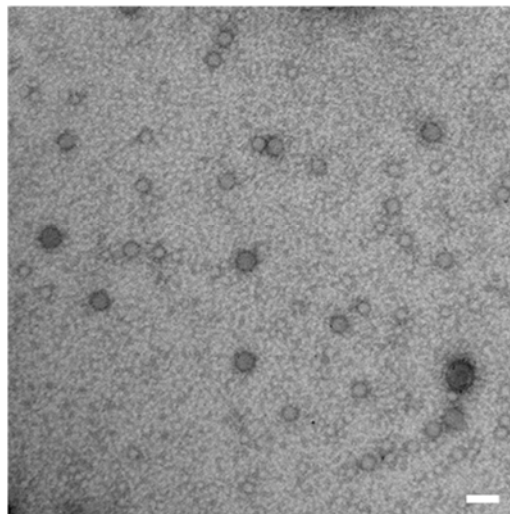

**Figure S6.** Representative TEM images of the (A) empty NPs stained with 0.75% uranyl formate and (B) GW-NPs stained with 1% uranyl acetate. Scale bars represent 100 nm.

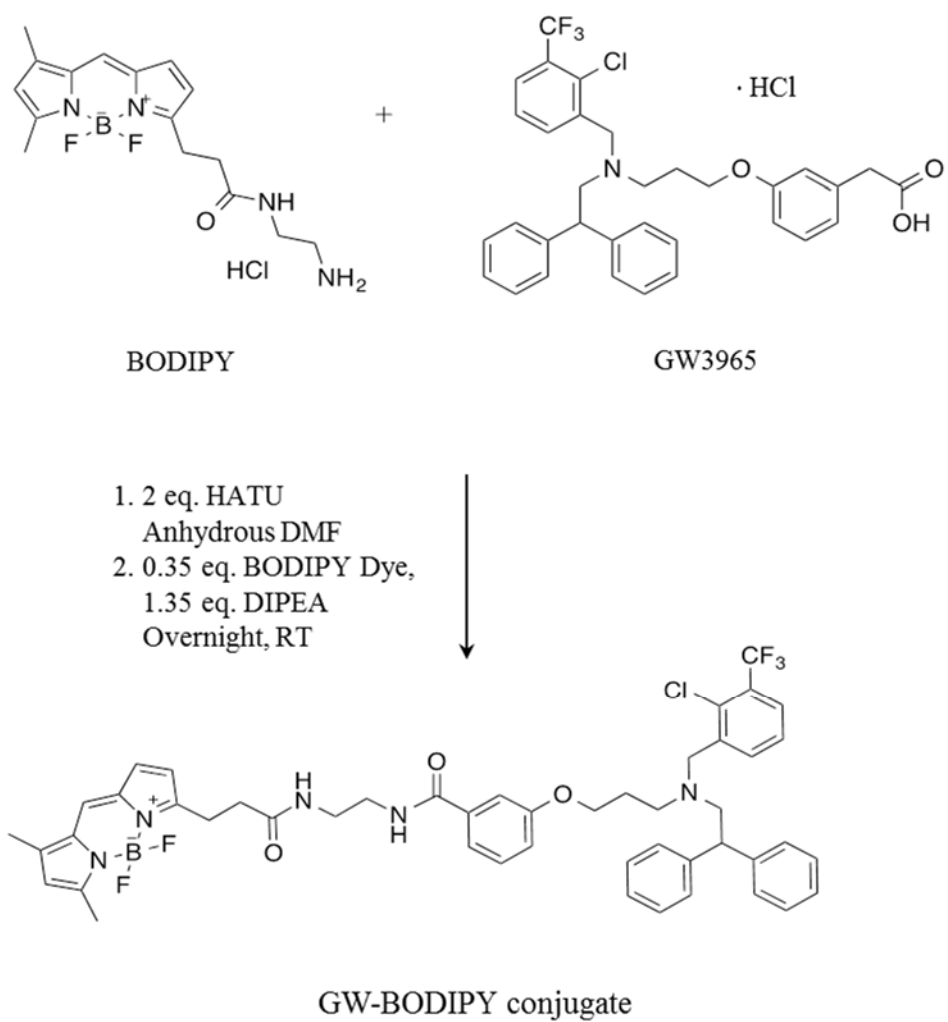

**Figure S7.** Synthetic scheme for GW-BODIPY conjugate.



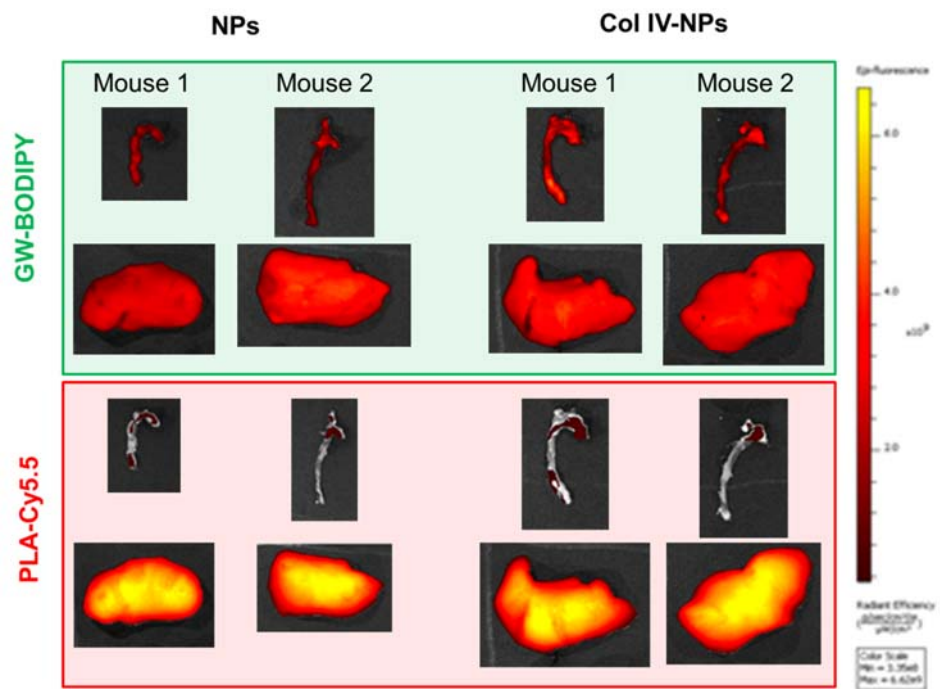

**Figure S8.** IVIS images for the relative accumulations of GW-BODIPY and PLA-Cy5.5 in the aorta and liver.
